# Supplementary material for: Modulating the coordination microenvironment of uranyl compounds to enhance photocatalytic CO2 reduction
Source: Royal Society of Chemistry journal article supplement (doi:10.1039/d3qi00769c), 2023-01-01
Supplement: d3qi00769c1.pdf [file d3qi00769c1.pdf]

## Modulating coordination microenvironment of uranyl compounds for enhance photocatalytic CO<sub>2</sub> reduction

Zhi-Wei Huang,<sup>a, b</sup> Shu-Wen An,<sup>\*c</sup> Kong-Qiu Hu,<sup>\*b</sup> Xiao-Bo Li,<sup>b</sup> Zhi-Ni Bin,<sup>b</sup> Zhi-Heng Zhou,<sup>b</sup> Lei Mei,<sup>b</sup> Zhi-Jun Guo,<sup>a</sup> Wang-Suo Wu,<sup>a</sup> Zhi-Fang Chai,<sup>d</sup> and Wei-Qun Shi <sup>\*b</sup>

<sup>a</sup> Radiochemistry Laboratory, School of Nuclear Science and Technology, Lanzhou University, Lanzhou 730000, China

<sup>b</sup> Laboratory of Nuclear Energy Chemistry, Institute of High Energy Physics, Chinese Academy of Sciences, Beijing 100049, China

<sup>c</sup> College of Nuclear Technology and Automation Engineering, Chengdu University of Technology, Chengdu 610059, China

<sup>d</sup> Engineering Laboratory of Advanced Energy Materials, Ningbo Institute of Materials Technology and Engineering, Chinese Academy of Sciences, Ningbo 315201, China

\* E-mail: Shu-Wen An (anshuwen@cdu.edu.cn); Kong-Qiu Hu (hukq@ihep.ac.cn); Wei-Qun Shi ([shiwq@ihep.ac.cn](mailto:shiwq@ihep.ac.cn)).

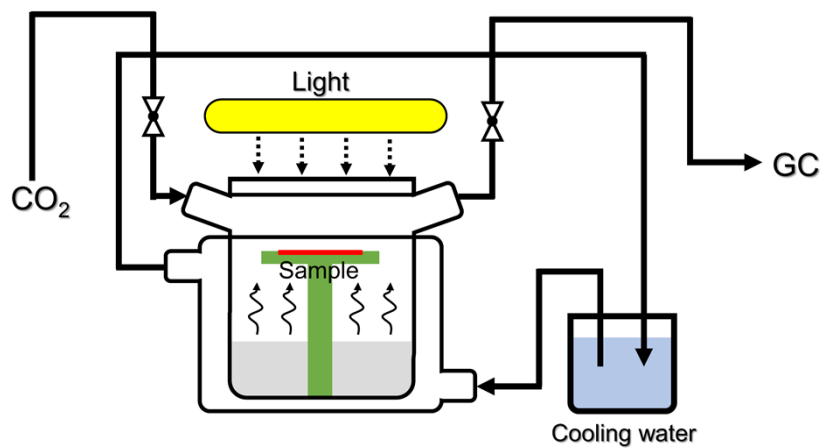

Figure S1. Schematic diagram of CO<sub>2</sub> photo-reduction system.

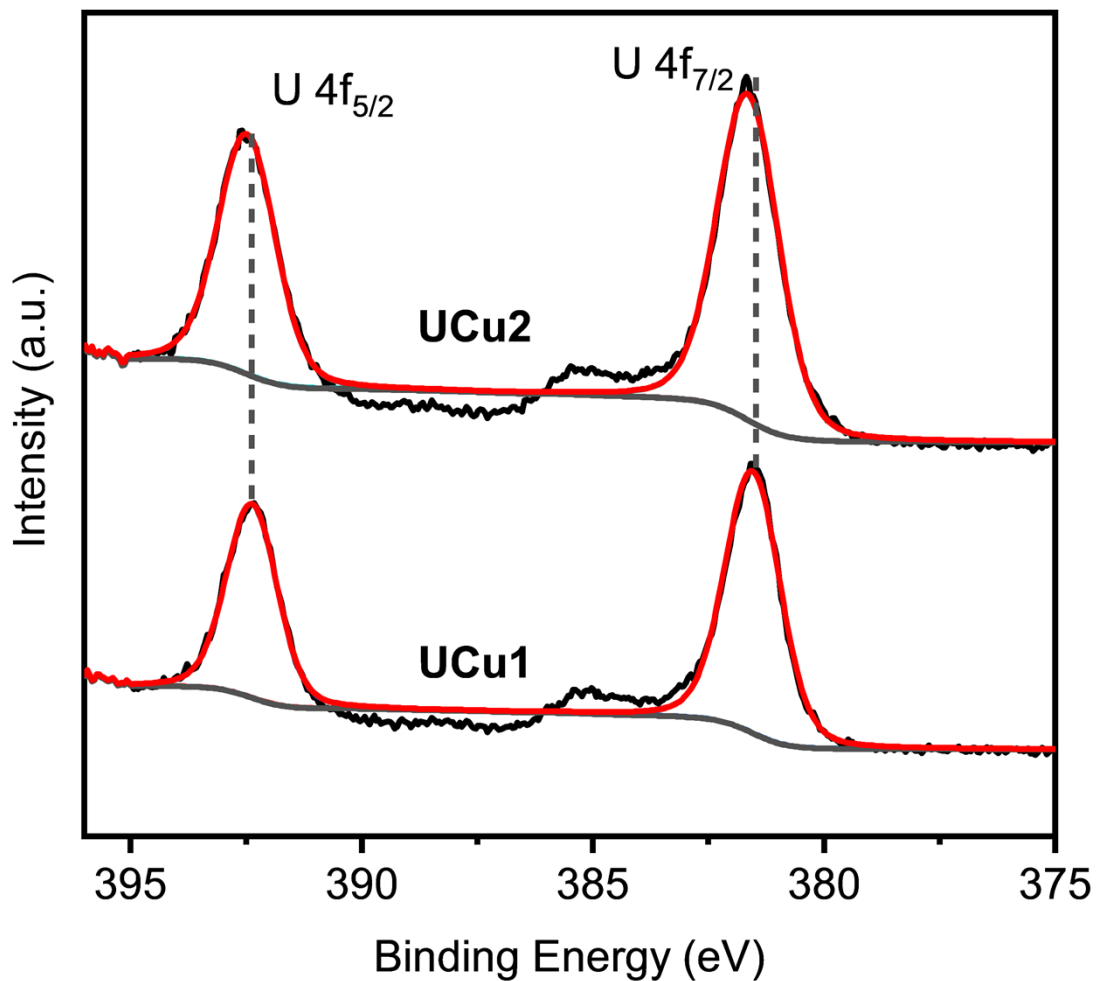

Figure S2. U 4f high resolution XPS spectra of the UCu1 and UCu2.

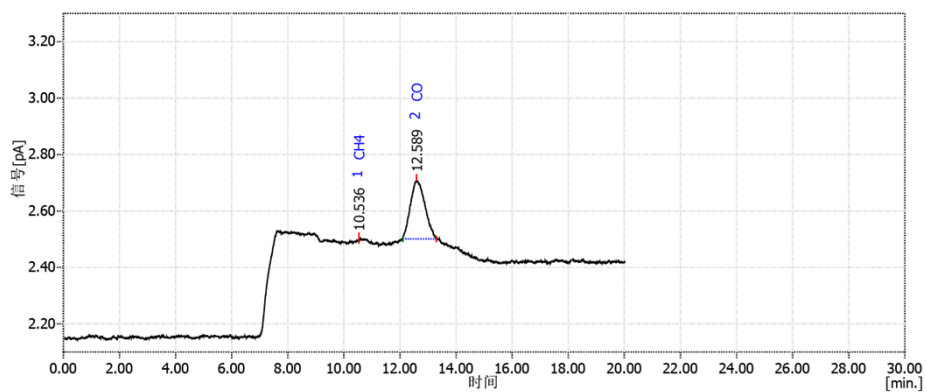

Figure S3. The gas products from photocatalytic CO<sub>2</sub> reduction analyzed by GC with FID detector.

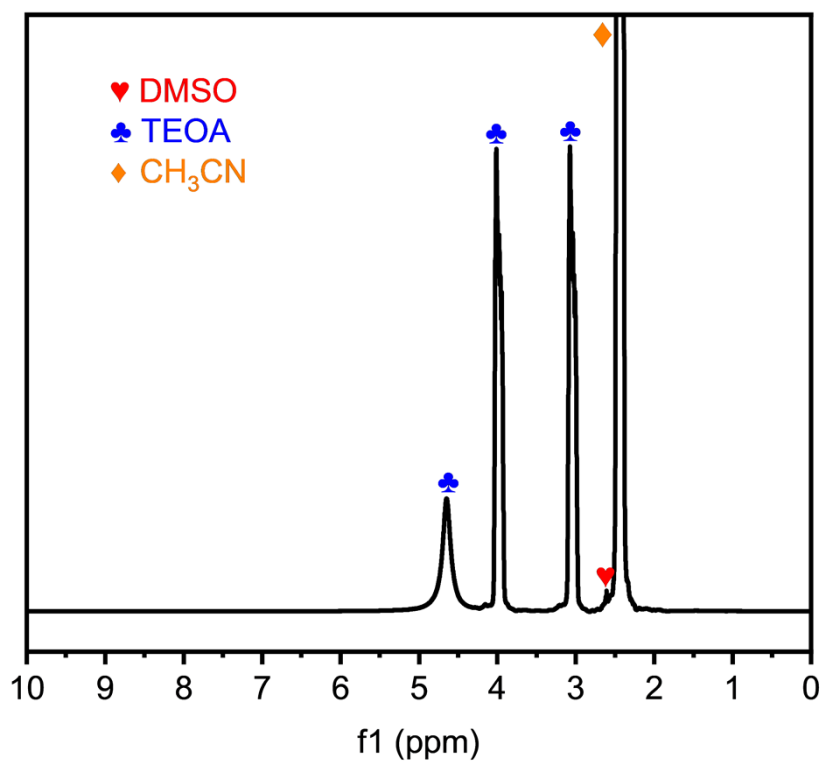

Figure S4. <sup>1</sup>H NMR spectrum of the liquid reaction products.

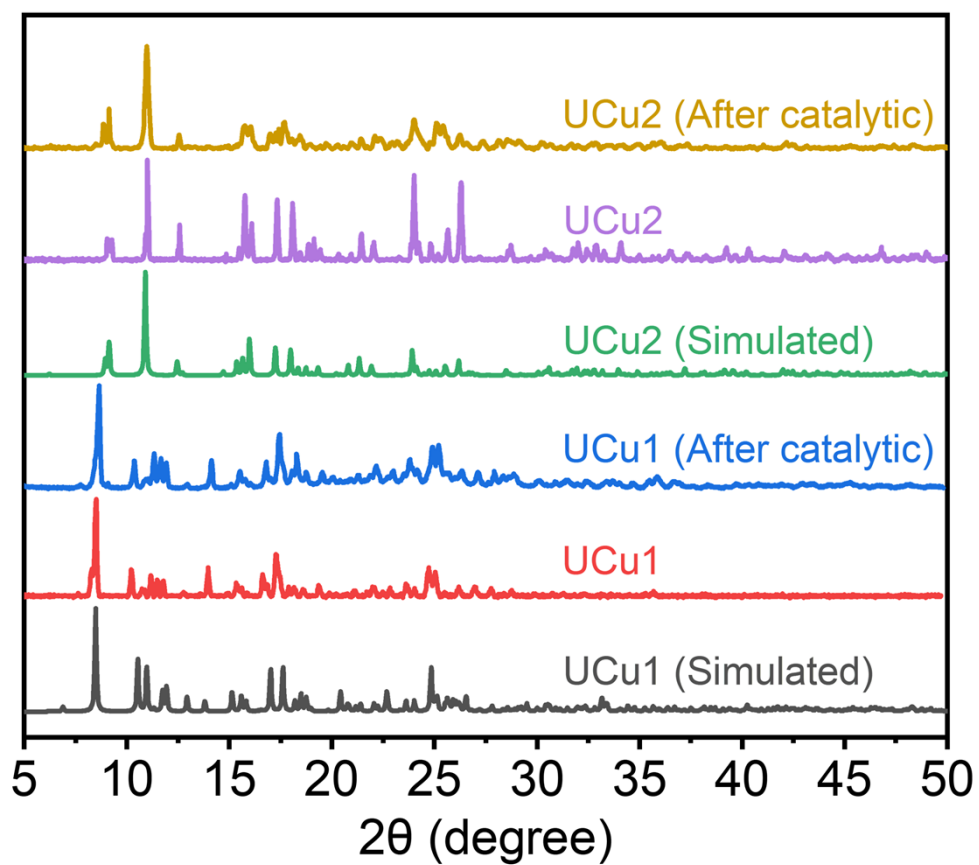

Figure S5. The PXRD patterns for the UCu1 and UCu2 before and after photocatalysis.

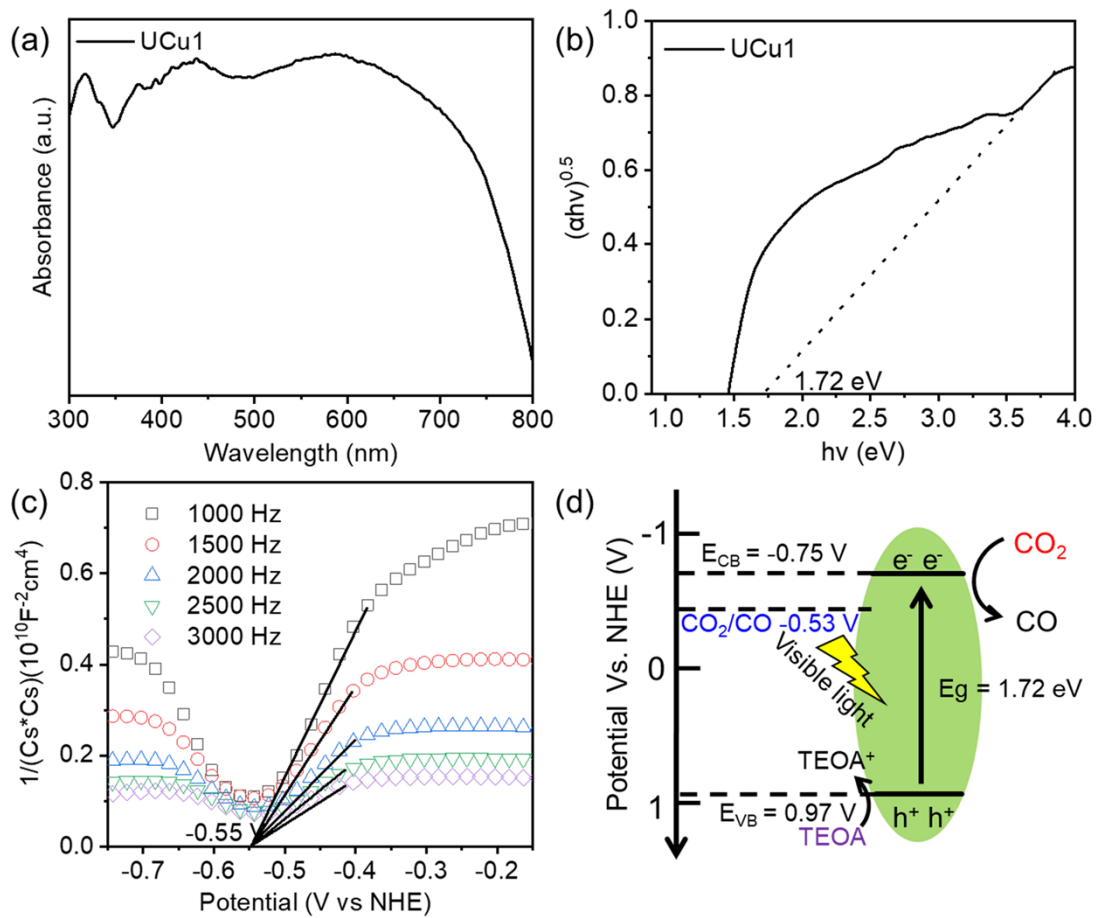

**Figure S6.** (a) The UV-Vis DRS spectrum of **UCu1**. (b) The corresponding plots of the  $(\alpha h\nu)^{0.5}$  versus photon energy ( $h\nu$ ) for **UCu1**. (c) The Mott-Schottky plots of **UCu1**. (d) The energy level diagram of **UCu1**.

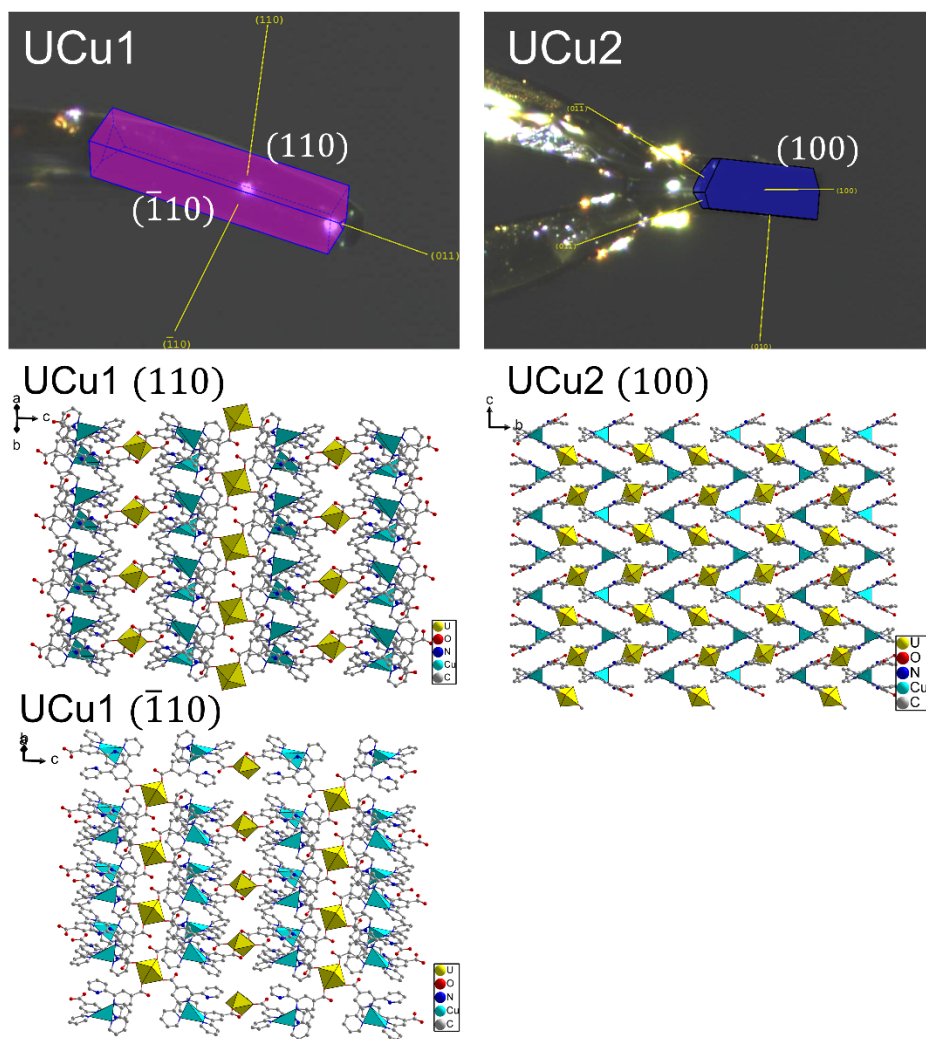

Figure S7. Crystal face index analyses of UCu1 and UCu2.

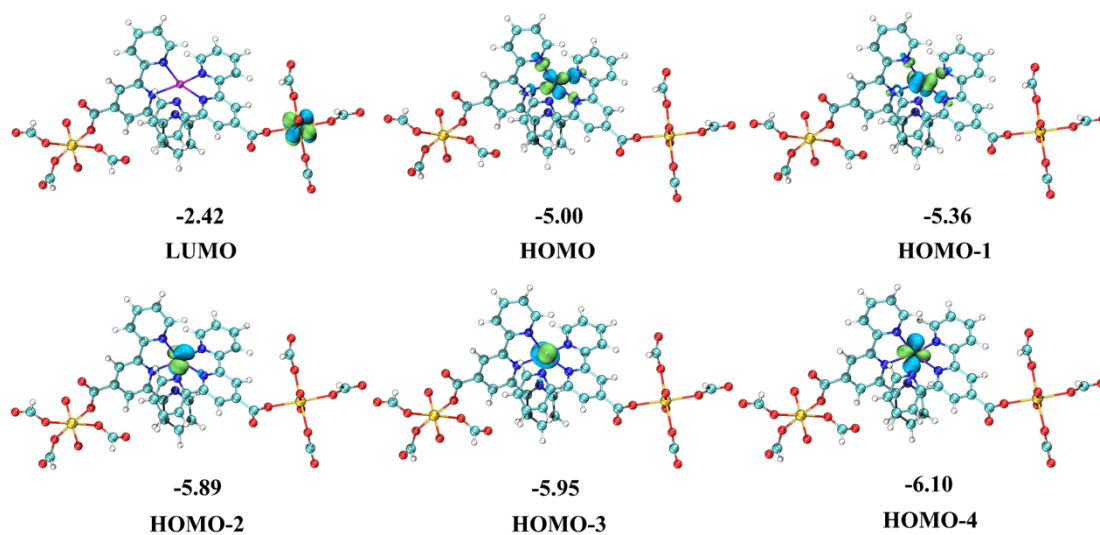

**Figure S8.** Frontier molecular orbital diagrams of **UCu1** complex in ACN solution at the B3LYP/ECP60MWB/def2-TZVP level of theory and the corresponding energies (eV). Yellow, purple, red, blue, cyan, and white balls represent U, Cu, O, N, C, and H atoms, respectively.

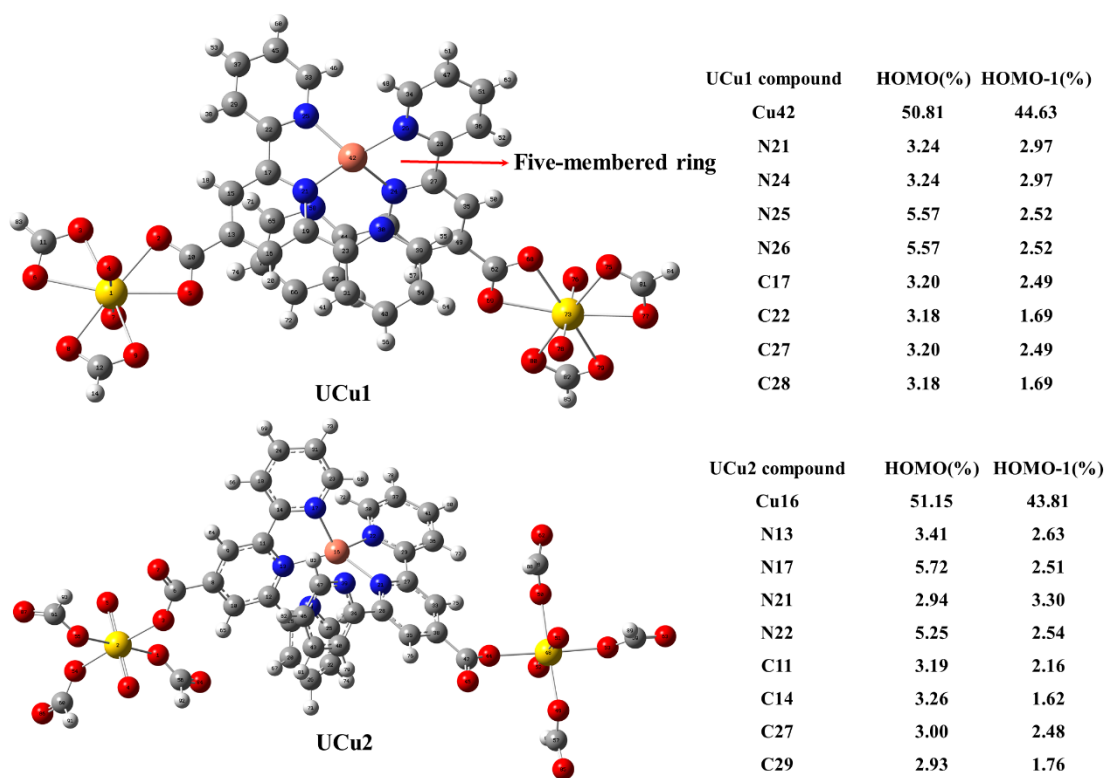

**Figure S9.** The structures of **UCu1** and **UCu2** compounds with the atom labels and the corresponding atom compositions of the HOMO and HOMO-1 orbitals.



**Table S1.** Selected Bond Lengths for **UCu1**.

| Atom | Atom            | Length/Å | Atom | Atom | Length/Å |
|------|-----------------|----------|------|------|----------|
| U1   | O1              | 2.282(3) | Cu1  | N1   | 2.032(3) |
| U1   | O2              | 1.773(3) | Cu1  | N2   | 2.088(3) |
| U1   | O4 <sup>1</sup> | 2.276(3) | Cu1  | N5   | 2.063(3) |
| Cu1  | N6              | 2.065(3) |      |      |          |

<sup>1</sup>2-X,-1/2+Y,1/2-Z;**Table S2.** Selected Bond Angles for **UCu1**.

| Atom            | Atom | Atom            | Angle/°    | Atom | Atom | Atom            | Angle/°    |
|-----------------|------|-----------------|------------|------|------|-----------------|------------|
| O1 <sup>1</sup> | U1   | O1              | 180.0      | N1   | Cu1  | N6              | 109.31(12) |
| O2              | U1   | O1              | 88.66(14)  | N1   | Cu1  | N5              | 149.89(13) |
| O2              | U1   | O1 <sup>1</sup> | 91.34(14)  | C6   | N2   | Cu1             | 110.4(2)   |
| O4 <sup>2</sup> | U1   | O1              | 87.79(11)  | C5   | N2   | Cu1             | 125.8(2)   |
| O4 <sup>2</sup> | U1   | O1 <sup>1</sup> | 92.21(11)  | C1   | O4   | U1 <sup>4</sup> | 145.7(3)   |
| O4 <sup>3</sup> | U1   | O2              | 89.00(16)  | C28  | N6   | Cu1             | 113.5(2)   |
| O4 <sup>3</sup> | U1   | O2 <sup>1</sup> | 91.00(16)  | C32  | N6   | Cu1             | 127.5(3)   |
| C25             | O1   | U1              | 149.6(3)   | C22  | N5   | Cu1             | 126.2(2)   |
| N6              | Cu1  | N2              | 138.12(12) | C27  | N5   | Cu1             | 112.7(2)   |
| N5              | Cu1  | N2              | 111.82(11) | C7   | N1   | Cu1             | 114.0(2)   |
| N5              | Cu1  | N6              | 80.35(11)  | C11  | N1   | Cu1             | 128.0(3)   |
| N1              | Cu1  | N2              | 80.56(11)  |      |      |                 |            |

<sup>1</sup>2-X,-Y,1-Z; <sup>2</sup>+X,1/2-Y,1/2+Z; <sup>3</sup>2-X,-1/2+Y,1/2-Z; <sup>4</sup>+X,1/2-Y,-1/2+Z

**Table S3.** Selected Bond Lengths for **UCu2**.

| Atom | Atom | Length/Å | Atom | Atom | Length/Å |
|------|------|----------|------|------|----------|
| U1   | O3   | 2.441(3) | U1   | C9   | 2.867(3) |
| U1   | O2   | 1.750(4) | U1   | C17  | 2.799(7) |
| U1   | O4   | 2.545(3) | N2   | Cu1  | 2.069(3) |
| U1   | O1   | 1.752(4) | Cu1  | N1   | 2.035(3) |
| U1   | O5   | 2.449(3) |      |      |          |

**Table S4.** Selected Bond Angles for **UCu2**.

| Atom            | Atom | Atom            | Angle/°    | Atom            | Atom | Atom            | Angle/°    |
|-----------------|------|-----------------|------------|-----------------|------|-----------------|------------|
| O3 <sup>1</sup> | U1   | O4              | 114.64(9)  | C6              | N2   | Cu1             | 127.7(2)   |
| O3              | U1   | O5 <sup>1</sup> | 121.82(10) | N2 <sup>2</sup> | Cu1  | N2              | 116.19(16) |
| O3              | U1   | O5              | 173.25(12) | N1 <sup>2</sup> | Cu1  | N2              | 138.82(11) |
| O2              | U1   | O1              | 179.4(2)   | N1              | Cu1  | N1 <sup>2</sup> | 110.34(17) |
| O4 <sup>1</sup> | U1   | O4              | 165.81(12) | C12             | N1   | Cu1             | 113.9(2)   |
| O5              | U1   | O4              | 123.44(9)  | C16             | N1   | Cu1             | 128.2(2)   |
| C11             | N2   | Cu1             | 111.5(2)   |                 |      |                 |            |

<sup>1</sup>1-X,+Y,+Z; <sup>2</sup>3/2-X,+Y,1/2-Z
